# Supplementary material for: Di-functional luminescent sensors based on Y3+ doped Eu3+ and Tb3+ coordination polymers: fast response and visible detection of Cr3+, Fe3+ ions in aqueous solutions and acetone
Source: Royal Society of Chemistry journal article supplement (doi:10.1039/d0ra06407f), 2020-01-01
Supplement: d0ra06407f1.pdf [file d0ra06407f1.pdf]

## Supporting Information

*for*

### **Di-functional Luminescent Sensors Based on Y<sup>3+</sup> Doped Eu<sup>3+</sup> and Tb<sup>3+</sup> Coordination Polymers: Fast Responsive and Visible Detection of Cr<sup>3+</sup>, Fe<sup>3+</sup> ions in aqueous solutions and Acetone**

Hongyan Liu,<sup>a</sup> Yang Liu,<sup>a</sup> Yu Meng,<sup>a</sup> Xiaolei Shi,<sup>a</sup> Junshan Sun,<sup>b</sup> Limin Zhao,<sup>a</sup>  
Diming Chen,<sup>c</sup> Hongguo Hao,<sup>\*a</sup> Dacheng Li,<sup>\*a</sup> Jianmin Dou,<sup>a</sup> and Jun Han<sup>d</sup>

*<sup>a</sup>Shandong Provincial Key Laboratory of Chemical Energy Storage and Novel Cell Technology, School of Chemistry and Chemical Engineering, College of Materials Science and Engineering, Institute of Biopharmaceutical Research, Liaocheng University, Liaocheng 252059, People's Republic of China*

*E-mail: [hg207@126.com](mailto:hg207@126.com), [lidacheng62@163.com](mailto:lidacheng62@163.com).*

*<sup>b</sup>College of Chemistry and Chemical Engineering, Taishan University, Taian 271000, Shandong Province, People's Republic of China*

*<sup>c</sup>School of Computer and Communication Engineering, Zhengzhou University of Light Industry, Zhengzhou 450002, People's Republic of China*

**Table S1**

| Complex                                                                                                                       | <b>1-Y</b>                                                                                                                                                                 | <b>1-Eu<sup>1</sup></b>                                                                                                                                                                             | <b>1-Tb<sup>1</sup></b>                                                                                                                                                                               | <b>1-Gd<sup>2</sup></b>                                                                                                                                                     |
|-------------------------------------------------------------------------------------------------------------------------------|----------------------------------------------------------------------------------------------------------------------------------------------------------------------------|-----------------------------------------------------------------------------------------------------------------------------------------------------------------------------------------------------|-------------------------------------------------------------------------------------------------------------------------------------------------------------------------------------------------------|-----------------------------------------------------------------------------------------------------------------------------------------------------------------------------|
| Crystal data                                                                                                                  | 1989014                                                                                                                                                                    | 1814159                                                                                                                                                                                             | 1814160                                                                                                                                                                                               | 1864276                                                                                                                                                                     |
| formula                                                                                                                       | [Y(C <sub>16</sub> H <sub>6</sub> O <sub>8</sub> ) <sub>0.5</sub> (C <sub>4</sub> H <sub>9</sub> ON)<br>(C <sub>2</sub> H <sub>3</sub> O <sub>2</sub> )(H <sub>2</sub> O)] | [Eu <sub>2</sub> (C <sub>16</sub> H <sub>6</sub> O <sub>8</sub> )(C <sub>4</sub> H <sub>9</sub> ON) <sub>2</sub><br>(C <sub>2</sub> H <sub>3</sub> O <sub>2</sub> ) <sub>2</sub> ·4H <sub>2</sub> O | [Tb <sub>2</sub> (C <sub>16</sub> H <sub>6</sub> O <sub>8</sub> )(C <sub>4</sub> H <sub>9</sub> ON)<br>) <sub>2</sub> (C <sub>2</sub> H <sub>3</sub> O <sub>2</sub> ) <sub>2</sub> ·4H <sub>2</sub> O | [Gd(C <sub>16</sub> H <sub>6</sub> O <sub>8</sub> ) <sub>0.5</sub> (C <sub>4</sub> H <sub>9</sub> ON)<br>(C <sub>2</sub> H <sub>3</sub> O <sub>2</sub> )(H <sub>2</sub> O)] |
| <i>M<sub>r</sub></i>                                                                                                          | 416.2                                                                                                                                                                      | 988.5                                                                                                                                                                                               | 1002.4                                                                                                                                                                                                | 484.5                                                                                                                                                                       |
| Temperature/K                                                                                                                 | 298                                                                                                                                                                        | 298                                                                                                                                                                                                 | 298                                                                                                                                                                                                   | 298                                                                                                                                                                         |
| crystal size/mm <sup>3</sup>                                                                                                  | 0.11 × 0.14 × 0.14                                                                                                                                                         | 0.13 × 0.16 × 0.14                                                                                                                                                                                  | 0.13 × 0.12 × 0.15                                                                                                                                                                                    | 0.11 × 0.15 × 0.13                                                                                                                                                          |
| Crystal system,                                                                                                               | Monoclinic                                                                                                                                                                 | Monoclinic                                                                                                                                                                                          | Monoclinic                                                                                                                                                                                            | Monoclinic                                                                                                                                                                  |
| space group                                                                                                                   | <i>P</i> 2 <sub>1</sub> / <i>n</i>                                                                                                                                         | <i>P</i> 2 <sub>1</sub> / <i>n</i>                                                                                                                                                                  | <i>P</i> 2 <sub>1</sub> / <i>n</i>                                                                                                                                                                    | <i>P</i> 2 <sub>1</sub> / <i>n</i>                                                                                                                                          |
| <i>a</i> (Å)                                                                                                                  | 9.3026(8)                                                                                                                                                                  | 9.4453(5)                                                                                                                                                                                           | 9.3676(7)                                                                                                                                                                                             | 9.3992(8)                                                                                                                                                                   |
| <i>b</i> (Å)                                                                                                                  | 17.5625 (14)                                                                                                                                                               | 17.7439(14)                                                                                                                                                                                         | 17.6232(14)                                                                                                                                                                                           | 17.6714(15)                                                                                                                                                                 |
| <i>c</i> (Å)                                                                                                                  | 11.3369 (9)                                                                                                                                                                | 11.3019(8)                                                                                                                                                                                          | 11.3172(9)                                                                                                                                                                                            | 11.2971(9)                                                                                                                                                                  |
| <i>α, β, γ</i> °                                                                                                              | 90, 94.35(1), 90                                                                                                                                                           | 90, 94.278(1), 90                                                                                                                                                                                   | 90, 94.351(2), 90                                                                                                                                                                                     | 90, 94.318(3), 90                                                                                                                                                           |
| <i>V</i> /Å <sup>3</sup>                                                                                                      | 1846.9(3)                                                                                                                                                                  | 1888.9(2)                                                                                                                                                                                           | 1862.9(3)                                                                                                                                                                                             | 1871.1(3)                                                                                                                                                                   |
| <i>Z</i>                                                                                                                      | 2                                                                                                                                                                          | 1                                                                                                                                                                                                   | 1                                                                                                                                                                                                     | 2                                                                                                                                                                           |
| F(000)                                                                                                                        | 836                                                                                                                                                                        | 932                                                                                                                                                                                                 | 972                                                                                                                                                                                                   | 944                                                                                                                                                                         |
| Radiation type                                                                                                                | Mo <i>Kα</i>                                                                                                                                                               | Mo <i>Kα</i>                                                                                                                                                                                        | Mo <i>Kα</i>                                                                                                                                                                                          | Mo <i>Kα</i>                                                                                                                                                                |
| <i>μ</i> (mm <sup>-1</sup> )                                                                                                  | 3.2                                                                                                                                                                        | 3.36                                                                                                                                                                                                | 3.83                                                                                                                                                                                                  | 3.58                                                                                                                                                                        |
| Data collection                                                                                                               | Bruker APEXII CCD                                                                                                                                                          | Bruker APEXII CCD                                                                                                                                                                                   | Bruker APEXII CCD                                                                                                                                                                                     | Bruker APEXII CCD                                                                                                                                                           |
| Diffractionmeter                                                                                                              | Multi-scan (SADABS);                                                                                                                                                       | Multi-scan (SADABS);                                                                                                                                                                                | Multi-scan (SADABS);                                                                                                                                                                                  | Multi-scan (SADABS);                                                                                                                                                        |
| Absorption correction                                                                                                         | Sheldrick, 2003)                                                                                                                                                           | Sheldrick, 2003)                                                                                                                                                                                    | Sheldrick, 2003)                                                                                                                                                                                      | Sheldrick, 2003)                                                                                                                                                            |
| <i>T<sub>min</sub>, T<sub>max</sub></i>                                                                                       | 0.682, 0.741                                                                                                                                                               | 0.356, 0.610                                                                                                                                                                                        | 0.659, 0.656                                                                                                                                                                                          | 0.368, 0.423                                                                                                                                                                |
| No. of measured,<br>independent and<br>observed [ <i>I</i> > 2σ( <i>I</i> )]<br>reflections                                   | 3254, 3254, 1686                                                                                                                                                           | 8950, 3206, 2250                                                                                                                                                                                    | 8955, 3162, 2200                                                                                                                                                                                      | 8879, 3296, 2207                                                                                                                                                            |
| <i>R<sub>int</sub></i>                                                                                                        | 0.060                                                                                                                                                                      | 0.0101                                                                                                                                                                                              | 0.072                                                                                                                                                                                                 | 0.0080                                                                                                                                                                      |
| (sin <i>θ</i> /λ) <sub>max</sub> (Å <sup>-1</sup> )                                                                           | 0.595                                                                                                                                                                      | 0.595                                                                                                                                                                                               | 0.595                                                                                                                                                                                                 | 0.595                                                                                                                                                                       |
| Refinement <i>R</i> [ <i>F</i> <sup>2</sup> > 2σ<br>( <i>F</i> <sup>2</sup> )], <i>wR</i> ( <i>F</i> <sup>2</sup> ), <i>S</i> | 0.062, 0.294, 1.0                                                                                                                                                          | 0.072, 0.196, 0.96                                                                                                                                                                                  | 0.060, 0.155, 1.01                                                                                                                                                                                    | 0.091, 0.258, 1.07                                                                                                                                                          |
| No. of reflections                                                                                                            | 3354                                                                                                                                                                       | 3206                                                                                                                                                                                                | 3162                                                                                                                                                                                                  | 3296                                                                                                                                                                        |
| No. of parameters                                                                                                             | 222                                                                                                                                                                        | 208                                                                                                                                                                                                 | 221                                                                                                                                                                                                   | 209                                                                                                                                                                         |
| H-atom treatment                                                                                                              | H-atom parameters<br>constrained                                                                                                                                           | H-atom parameters<br>constrained                                                                                                                                                                    | H-atom parameters<br>constrained                                                                                                                                                                      | H-atom parameters<br>constrained                                                                                                                                            |
| <i>Δρ</i> <sub>max</sub> , <i>Δρ</i> <sub>min</sub>                                                                           | 1.80, -1.00                                                                                                                                                                | 1.42, -2.36                                                                                                                                                                                         | 1.50, -1.58                                                                                                                                                                                           | 2.43, -2.74                                                                                                                                                                 |

Computer programs: *CrysAlis PRO*, Agilent Technologies, *SHELXL97* (Sheldrick, 1997). *SHELXL2014* (Sheldrick, 2015),

*DIAMOND* (Brandenburg & Putz, 2005) and *pubCIF* (Westrip, 2010).

**1-Eu**, **1-Tb** and **1-Gd** have been published in our previous work.<sup>1-2</sup>

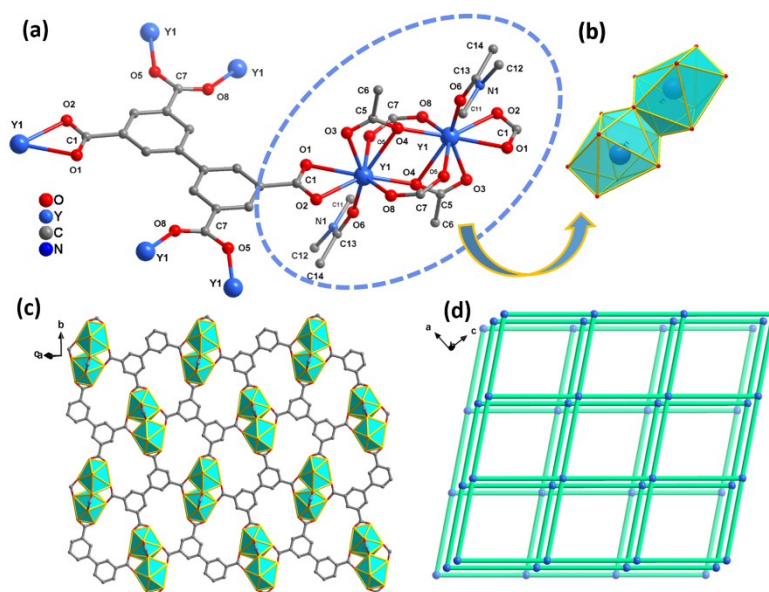

**Fig.S1** View of the coordination environments of the ligand (a) and Y(III)(b) atoms. (code: C, gray ; O, red; N, dark blue; Y, blue) The hydrogen atoms are omitted for clarity. (c) The polyhedron of 3D framework viewed from b axis. (d) The simplified topology structure of **1-Y**.

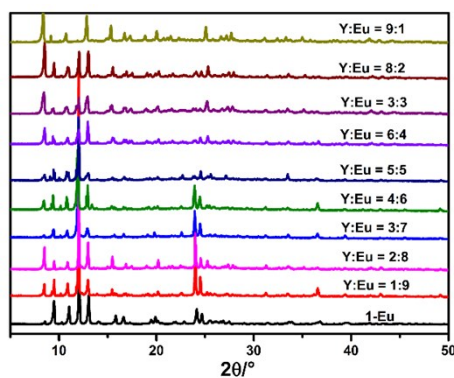

**Fig. S2** PXRD patterns of  $\text{Eu}_x\text{Y}_{1-x}$  ( $x = 0.1, 0.2, 0.3, 0.4, 0.5, 0.6, 0.7, 0.8, 0.9$ ).

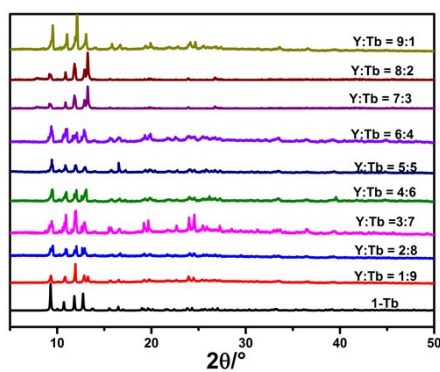

**Fig.S3** PXRD patterns of  $Tb_xY_{1-x}$  ( $x = 0.1, 0.2, 0.3, 0.4, 0.5, 0.6, 0.7, 0.8, 0.9$ ).

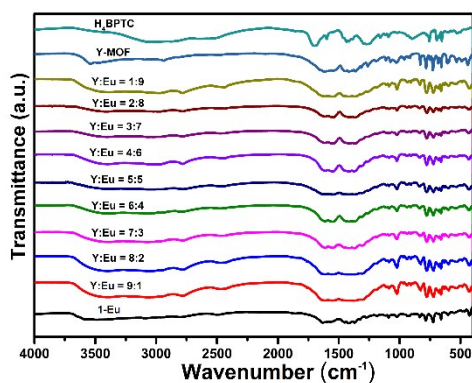

**Fig.S4** IR spectra (KBr pellet, cm<sup>-1</sup>) of H<sub>4</sub>BPTC, 1-Y and  $Eu_xY_{1-x}$  ( $x = 0.1, 0.2, 0.3, 0.4, 0.5, 0.6, 0.7, 0.8, 0.9$ ).

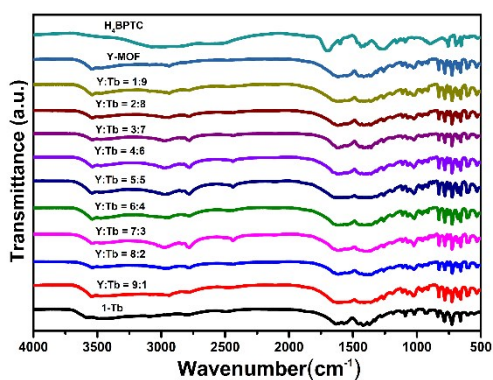

**Fig.S5** IR spectra (KBr pellet, cm<sup>-1</sup>) of H<sub>4</sub>BPTC, 1-Y and  $Tb_xY_{1-x}$  ( $x = 0.1, 0.2, 0.3, 0.4, 0.5, 0.6, 0.7, 0.8, 0.9$ ).

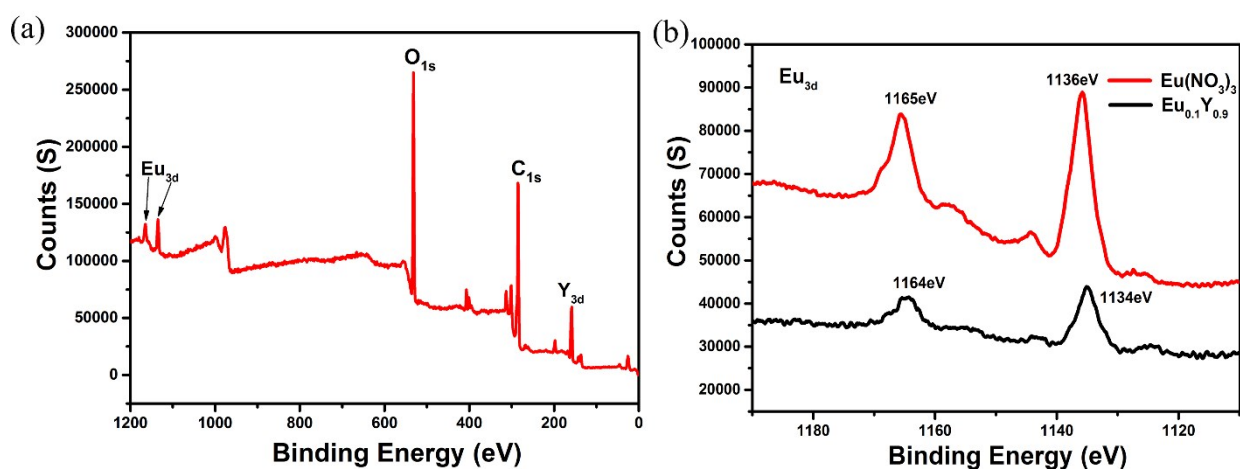

**Fig. S6** XPS spectra (a) and (b) Eu<sub>3d</sub> of  $Eu_xY_{1-x}$ .

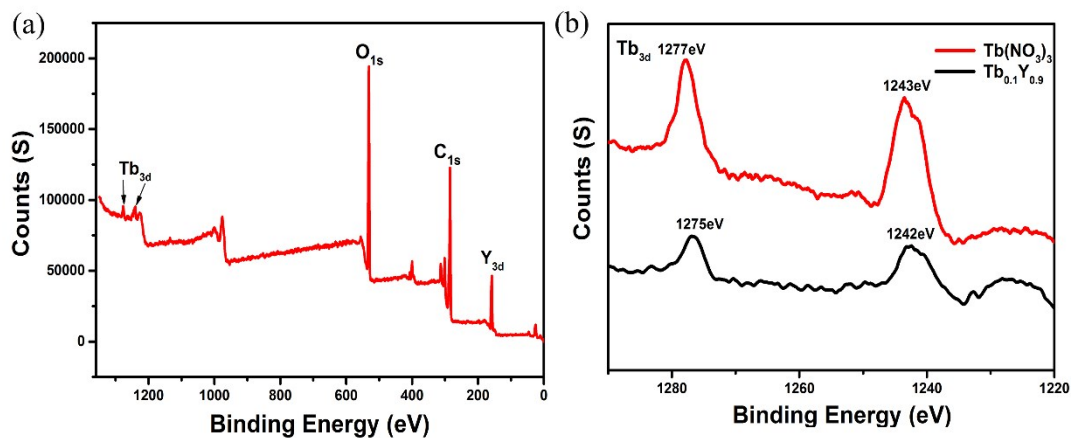

**Fig. S7** XPS spectra (a) and (b)  $Tb_{3d}$  of  $Tb_xY_{1-x}$ .

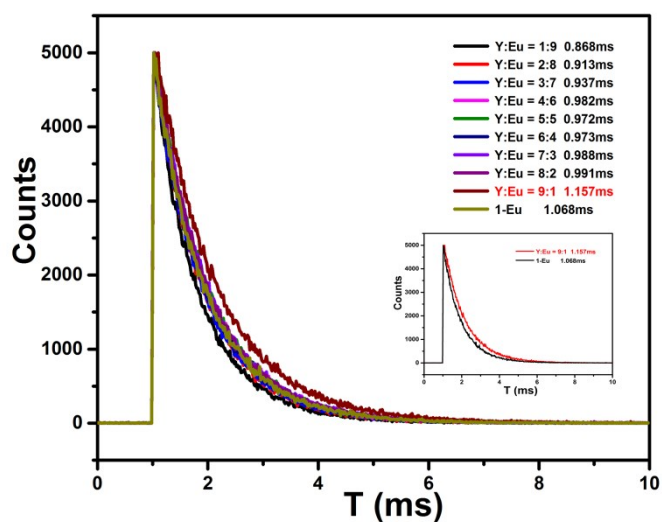

**Fig.S8** The luminescence decay lifetimes of  $Eu_xY_{1-x}$  at room temperature. Insert: The luminescence decay lifetimes of 1-Eu and  $Eu_{0.1}Y_{0.9}$ .

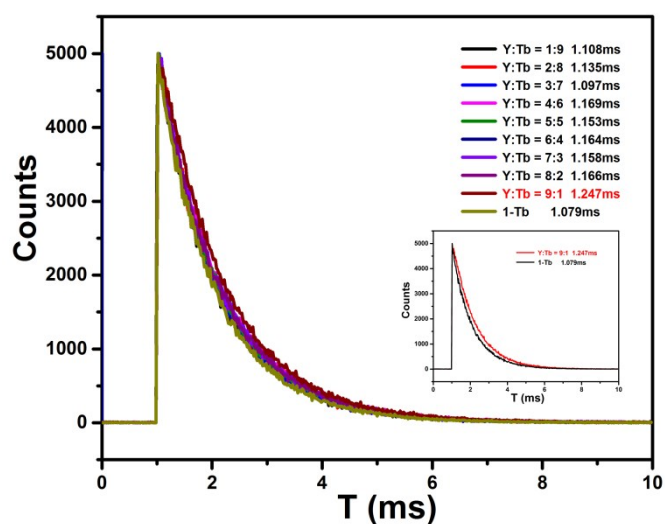

**Fig.S9** The luminescence decay lifetimes of  $Tb_xY_{1-x}$  at room temperature. Insert: The luminescence decay lifetimes of **1-Tb** and  $Tb_{0.1}Y_{0.9}$ .

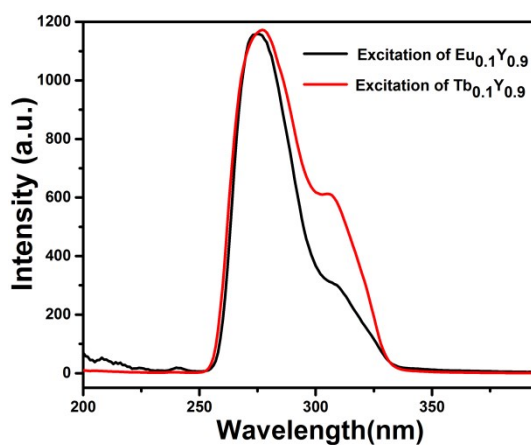

**Fig. S10** The excitation spectra of  $Eu_{0.1}Y_{0.9}$  and  $Tb_{0.1}Y_{0.9}$ .

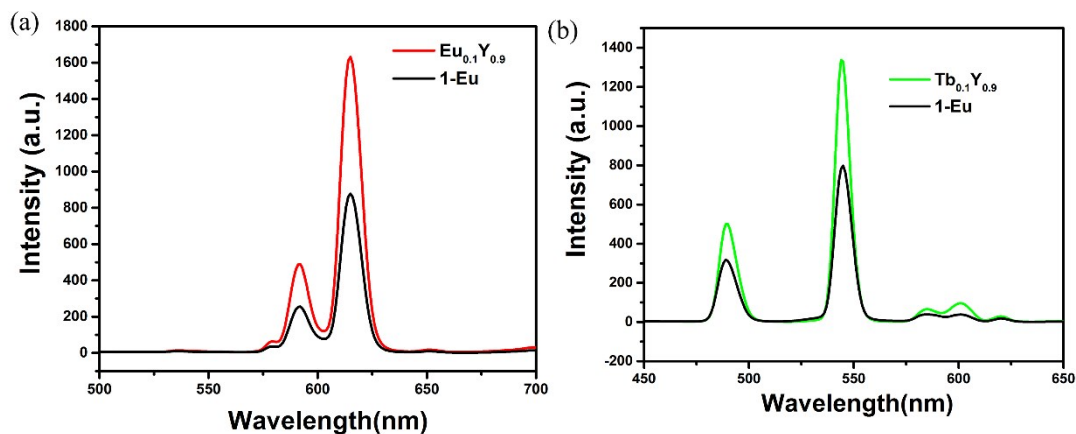

**Fig.S11** Luminescent spectra of (a)  $Eu_{0.1}Y_{0.9}$ , **1-Eu** and (b)  $Tb_{0.1}Y_{0.9}$ , **1-Tb** (2mg) in DMF (2mL) when excited at 275 nm.

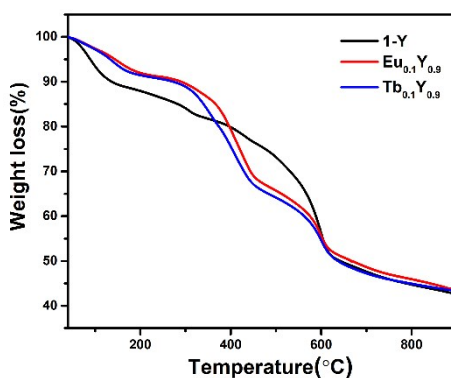

**Fig.S12** TG curves of **1-Y**,  $Eu_{0.1}Y_{0.9}$  and  $Tb_{0.1}Y_{0.9}$ .

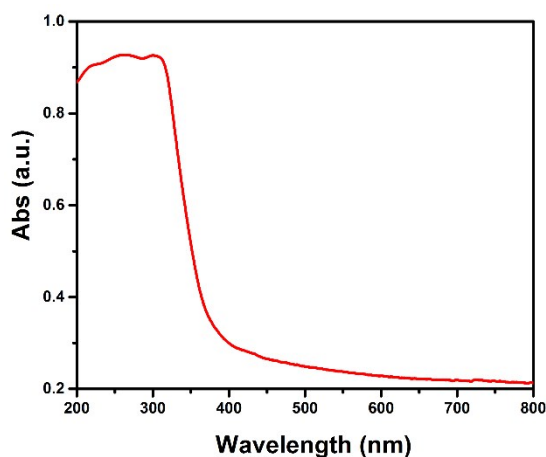

**Fig.S13** UV-vis adsorption spectra of H<sub>4</sub>BPTC in the solid state at room temperature.

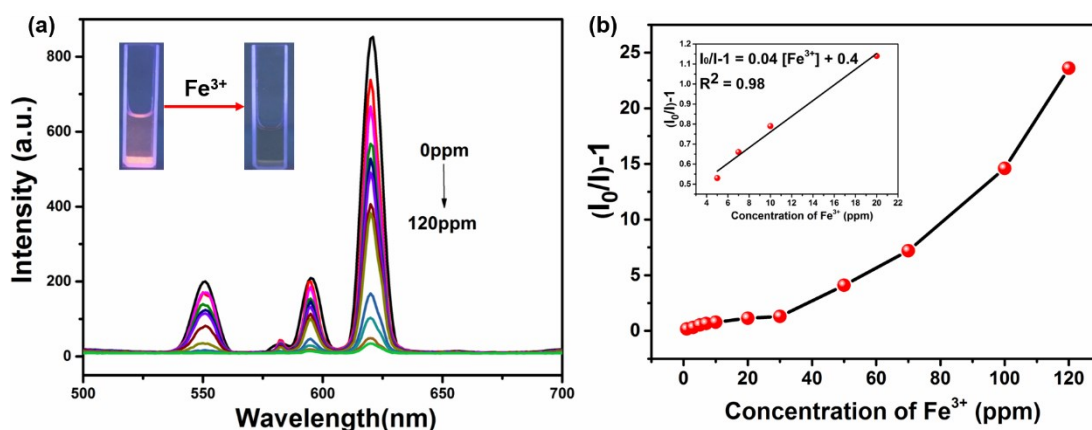

**Fig.S14** (a) Luminescent spectra of Eu<sub>0.1</sub>Y<sub>0.9</sub> upon the addition of various Fe<sup>3+</sup> concentrations in DMF when excited at 275 nm. (b) Nonlinear Stern-Volmer plot for Fe<sup>3+</sup> by exponential quenching equation. Inset: linear fitting plot of the Stern-Volmer plot with 0-20 ppm of Fe<sup>3+</sup>.

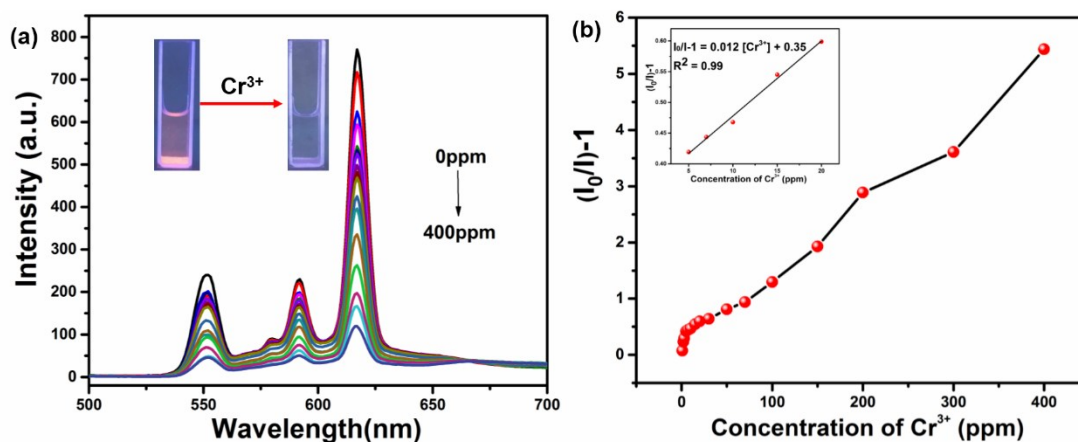

**Fig.S15** (a) Luminescent spectra of Eu<sub>0.1</sub>Y<sub>0.9</sub> upon the addition of various Cr<sup>3+</sup> concentrations in DMF when excited at 275 nm. (b) Nonlinear Stern-Volmer plot for

$\text{Cr}^{3+}$  by exponential quenching equation. Inset: linear fitting plot of the Stern-Volmer plot with 0-20 ppm of  $\text{Cr}^{3+}$ .

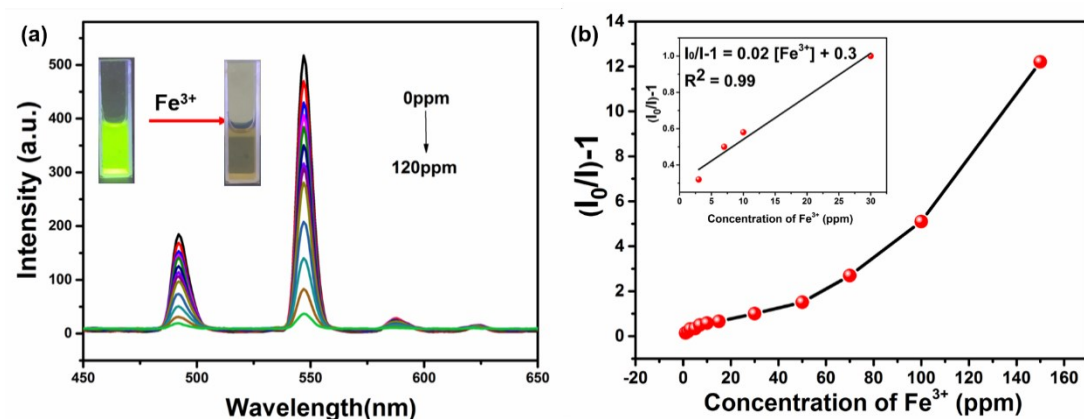

**Fig.S16** (a) Luminescent spectra of  $\text{Tb}_{0.1}\text{Y}_{0.9}$  upon the addition of various  $\text{Fe}^{3+}$  concentrations in DMF when excited at 275 nm. (b) Nonlinear Stern-Volmer plot for  $\text{Fe}^{3+}$  by exponential quenching equation. Inset: linear fitting plot of the Stern-Volmer plot with 0-30 ppm of  $\text{Fe}^{3+}$ .

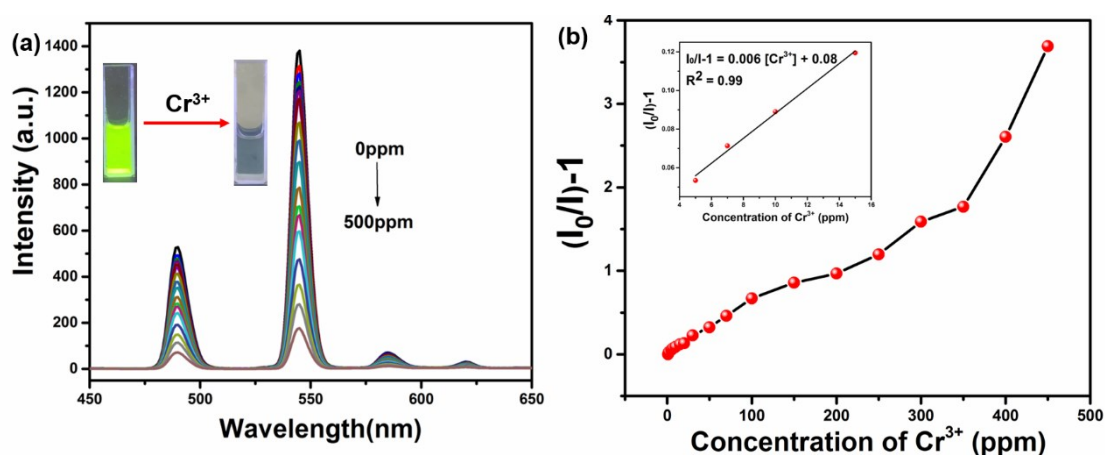

**Fig.S17** (a) Luminescent spectra of  $\text{Tb}_{0.1}\text{Y}_{0.9}$  upon the addition of various  $\text{Cr}^{3+}$  concentration in DMF when excited at 275 nm. (b) Nonlinear Stern-Volmer plot for  $\text{Cr}^{3+}$  by exponential quenching equation. Inset: linear fitting plot of the Stern-Volmer plot with 0-15 ppm of  $\text{Cr}^{3+}$ .

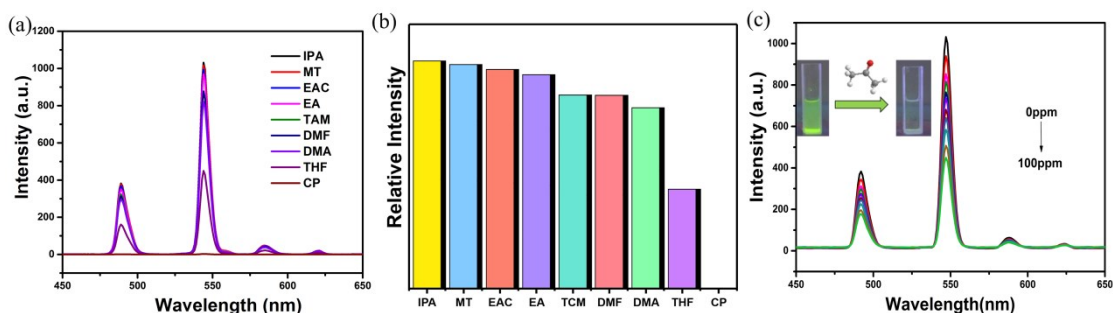



**Fig.S18** (a) Luminescent spectra of  $\text{Tb}_{0.1}\text{Y}_{0.9}$  dissolved in different solvents ( $\lambda_{\text{ex}} = 275 \text{ nm}$ ). (b) Bar chart obtained for  $\text{Tb}_{0.1}\text{Y}_{0.9}$  upon addition of different solvents. (c) Luminescent spectra of  $\text{Tb}_{0.1}\text{Y}_{0.9}$  with the gradual addition of acetone (0-100ppm).

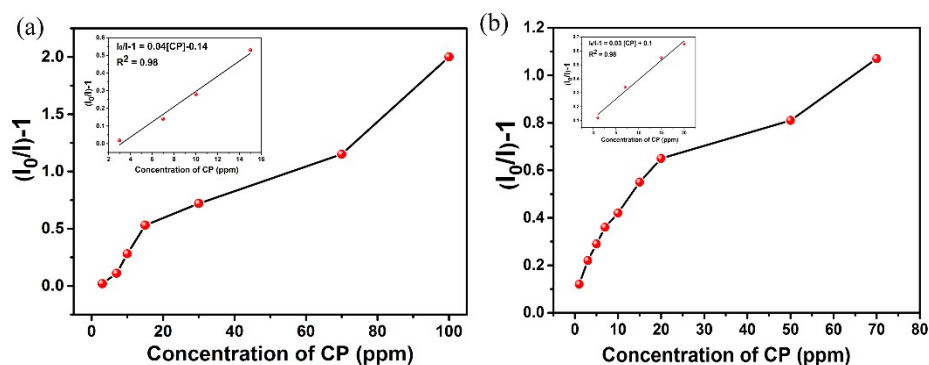

**Fig.S19** (a) Nonlinear Stern-Volmer plot for acetone by exponential quenching equation for  $\text{Eu}_{0.1}\text{Y}_{0.9}$ . Inset: linear fitting plot of the Stern-Volmer plot with 0-15 ppm of acetone. (b) Nonlinear Stern-Volmer plot for acetone by exponential quenching equation for  $\text{Tb}_{0.1}\text{Y}_{0.9}$ . Inset: linear fitting plot of the Stern-Volmer plot with 0-20 ppm of acetone.

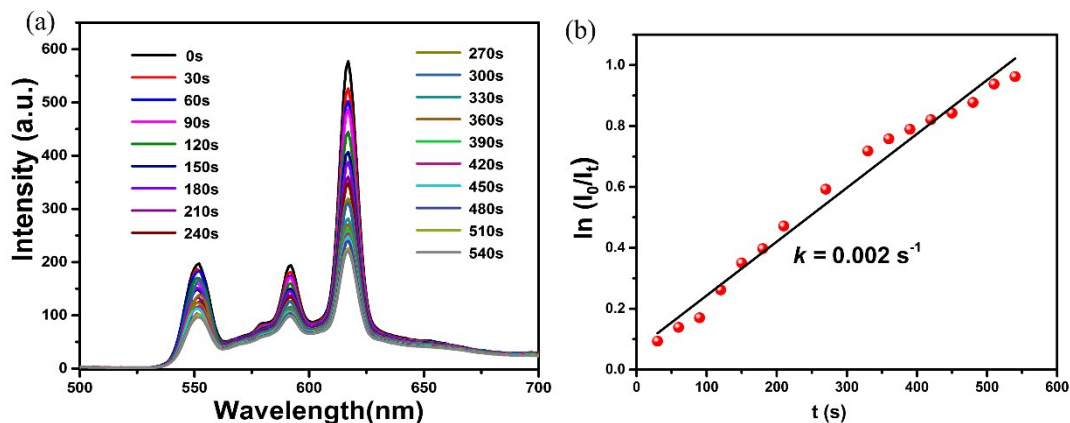

**Fig.S20** (a) Time-dependent emission spectra after exposure of  $\text{Eu}_{0.1}\text{Y}_{0.9}$  to  $\text{Cr}^{3+}$  ( $\lambda_{\text{ex}} = 275 \text{ nm}$ ). (b) Plots of  $\ln(I_0/I_t)$  for the luminescent intensity of  $\text{Eu}_{0.1}\text{Y}_{0.9}$  at  $615 \text{ nm}$  obtained from the spectra.

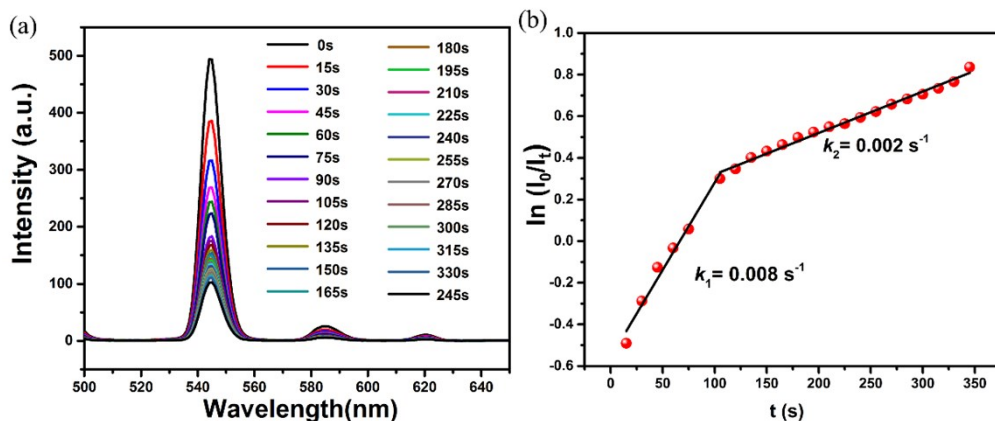

**Fig.S21** (a) Time-dependent emission spectra after exposure of  $\text{Tb}_{0.1}\text{Y}_{0.9}$  to  $\text{Fe}^{3+}$  ( $\lambda_{\text{ex}} = 275$  nm). (b) Plots of  $\ln(I_0/I_t)$  for the luminescent intensity of  $\text{Tb}_{0.1}\text{Y}_{0.9}$  at 544 nm obtained from the spectra.

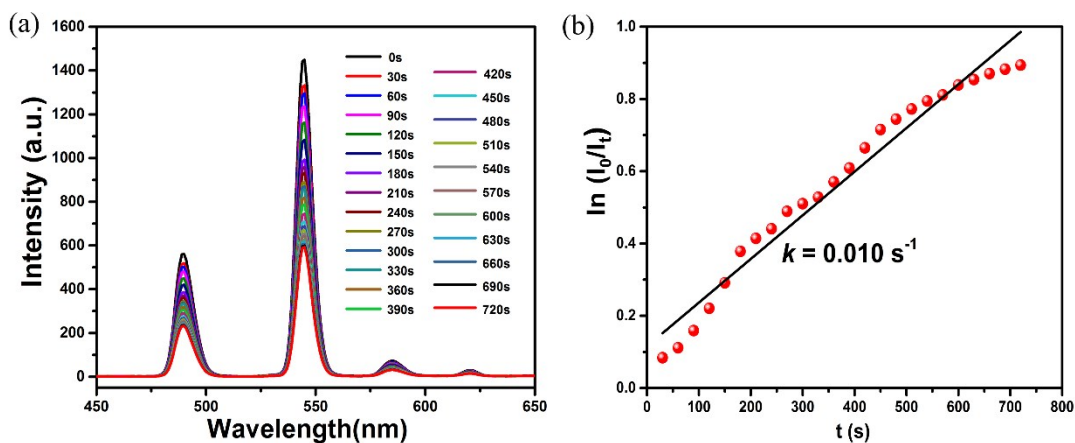

**Fig.S22** (a) Time-dependent emission spectra after exposure of  $\text{Tb}_{0.1}\text{Y}_{0.9}$  to  $\text{Cr}^{3+}$  ( $\lambda_{\text{ex}} = 275$  nm). (b) Plots of  $\ln(I_0/I_t)$  for the luminescent intensity of  $\text{Tb}_{0.1}\text{Y}_{0.9}$  at 544 nm obtained from the spectra.

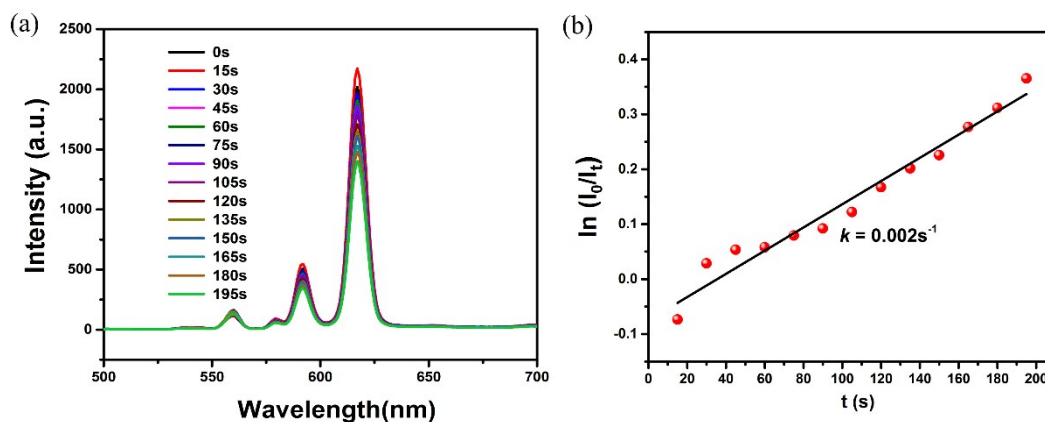

**Fig.S23** (a) Time-dependent emission spectra after exposure of **1-Eu** to  $\text{Fe}^{3+}$  ( $\lambda_{\text{ex}} = 275 \text{ nm}$ ). (b) Plots of  $\ln(I_0/I_t)$  for the luminescent intensity of **1-Eu** at 615nm obtained from the spectra.

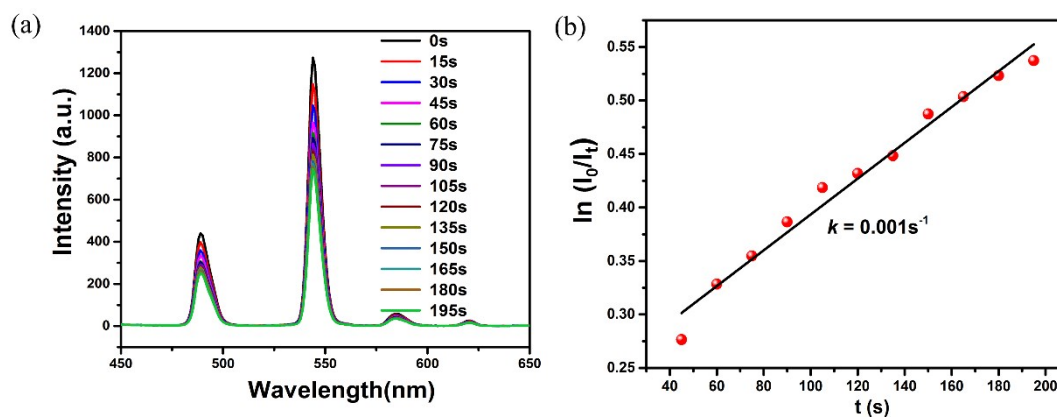

**Fig.S24** (a) Time-dependent emission spectra after exposure of **1-Tb** to  $\text{Fe}^{3+}$  ( $\lambda_{\text{ex}} = 275 \text{ nm}$ ). (b) Plots of  $\ln(I_0/I_t)$  for the luminescent intensity of **1-Tb** at 544 nm obtained from the spectra.

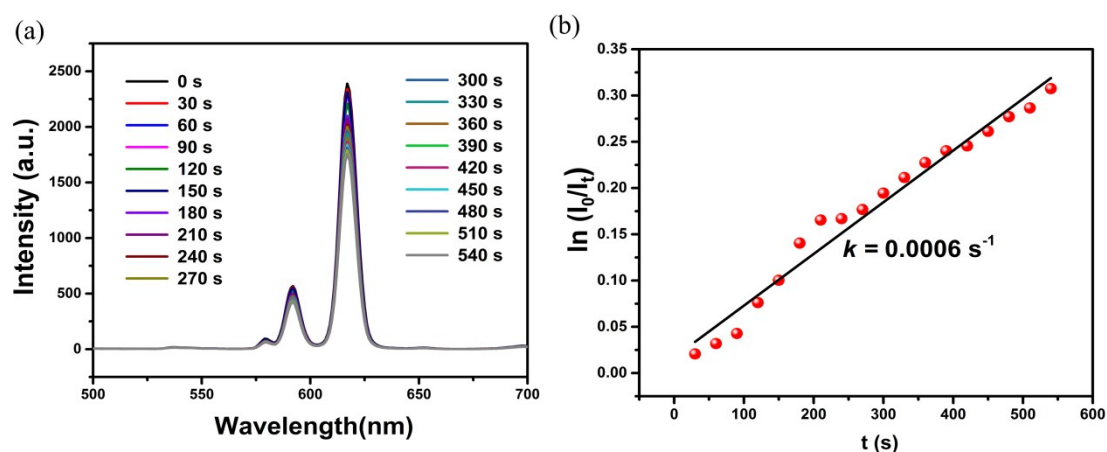

**Fig.S25** (a) Time-dependent emission spectra after exposure of **1-Eu** to  $\text{Cr}^{3+}$  ( $\lambda_{\text{ex}} = 275 \text{ nm}$ ). (b) Plots of  $\ln(I_0/I_t)$  for the luminescent intensity of **1-Eu** at 615nm obtained from the spectra.

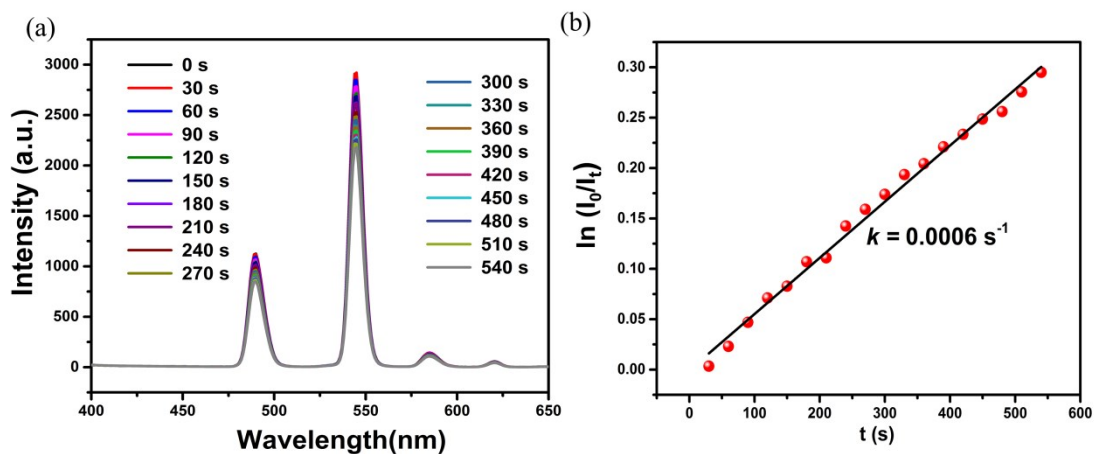

**Fig.S26** (a) Time-dependent emission spectra after exposure of **1-Tb** to  $\text{Cr}^{3+}$  ( $\lambda_{\text{ex}} = 275 \text{ nm}$ ). (b) Plots of  $\ln(I_0/I_i)$  for the luminescent intensity of **1-Tb** at 544nm obtained from the spectra.

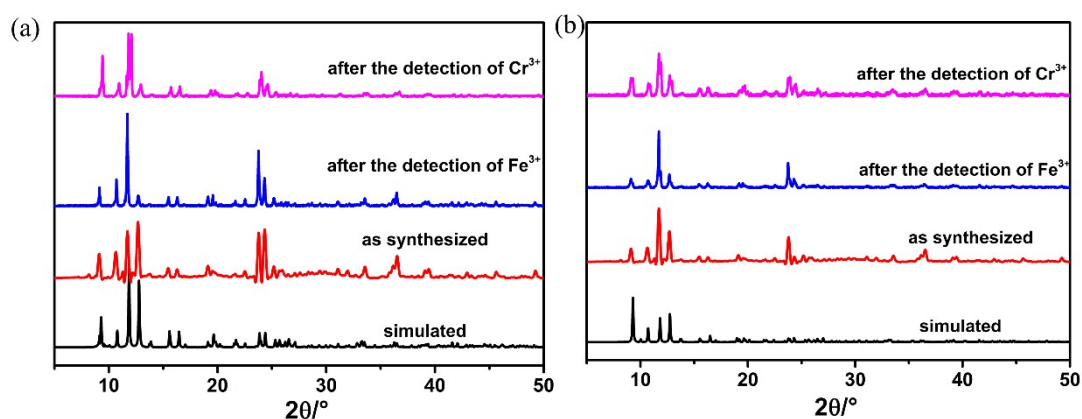

**Fig.S27** The PXRD pattern of (a)  $\text{Eu}_{0.1}\text{Y}_{0.9}$  and (b)  $\text{Tb}_{0.1}\text{Y}_{0.9}$  before and after the detection of  $\text{Fe}^{3+}$ ,  $\text{Cr}^{3+}$  and acetone.

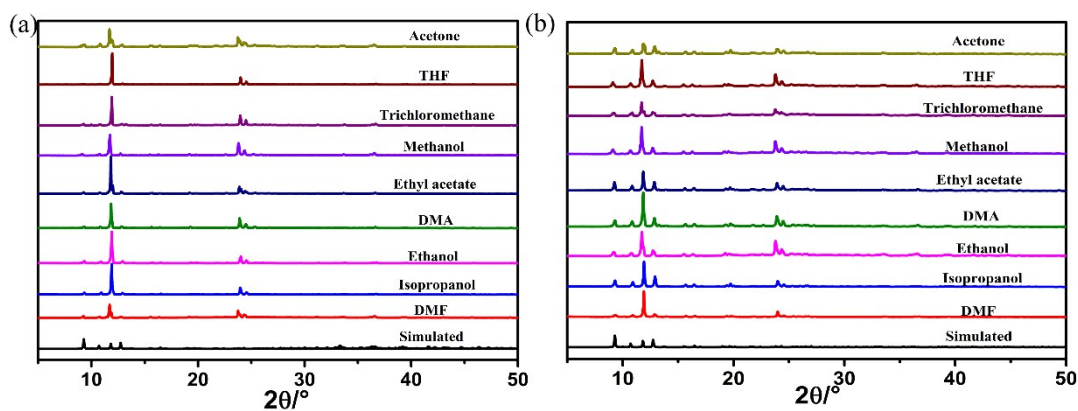

**Fig.S28** PXRD patterns of (a)  $\text{Eu}_{0.1}\text{Y}_{0.9}$  and (b)  $\text{Tb}_{0.1}\text{Y}_{0.9}$  immersed in different organic solutions for 24 hours.

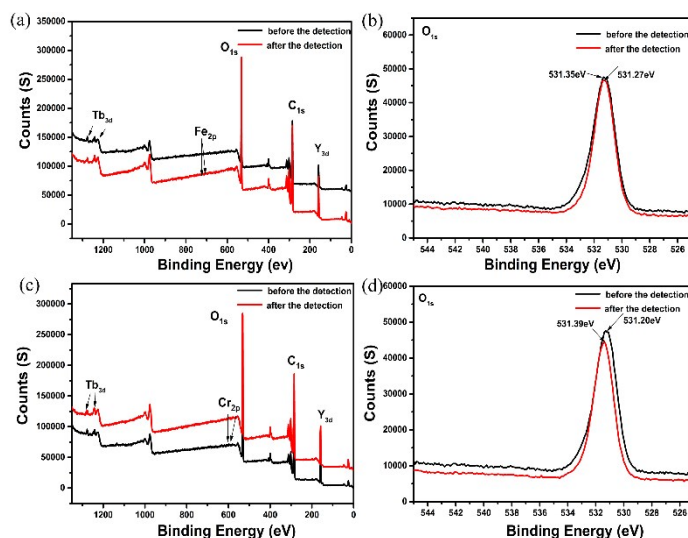

**Fig.S29** The XPS spectra of  $Tb_{0.1}Y_{0.9}$  before and after the detection of  $Fe^{3+}$  and  $Cr^{3+}$ .

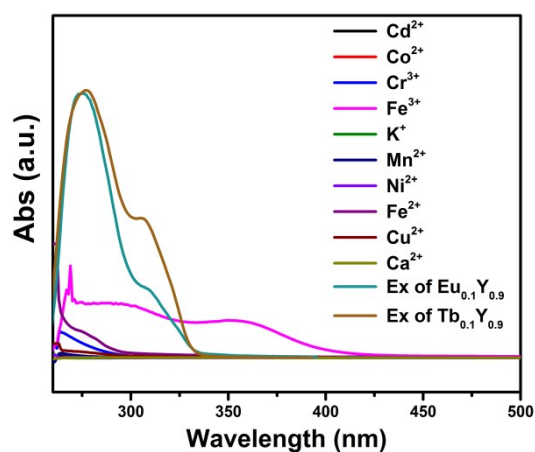

**Fig.S30** Spectral overlap between the excitation spectrum of  $Eu_{0.1}Y_{0.9}$ ,  $Tb_{0.1}Y_{0.9}$  ( $\lambda_{ex} = 275$  nm) and the absorption spectra of metal ions investigated in this work.

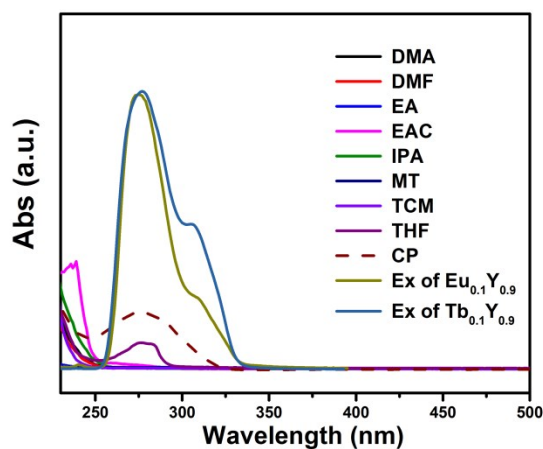

**Fig.S31** Spectral overlap between the excitation spectrum of  $Eu_{0.1}Y_{0.9}$ ,  $Tb_{0.1}Y_{0.9}$  ( $\lambda_{ex} = 275$  nm) and the absorption spectra of organic solutions investigated in this work.

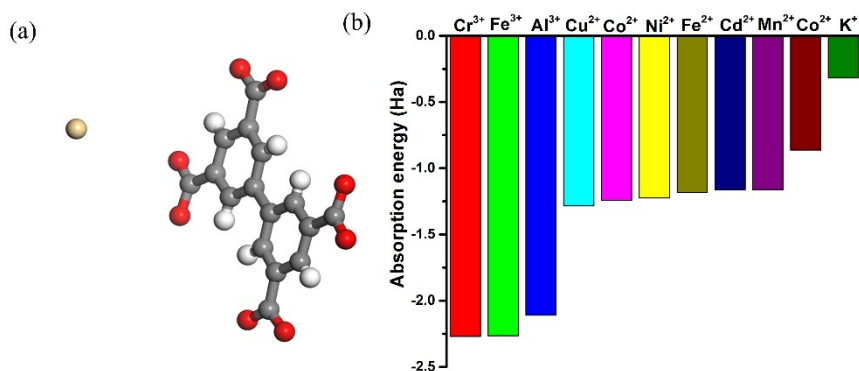

**Fig. S32** (a) The proposed structural model of M<sup>n+</sup> in 1-Ln. (code: C, gray; O, red; M<sup>n+</sup>, brown). (b) The adsorption energy results of 1-Ln treated with different metal ions calculated by DFT.

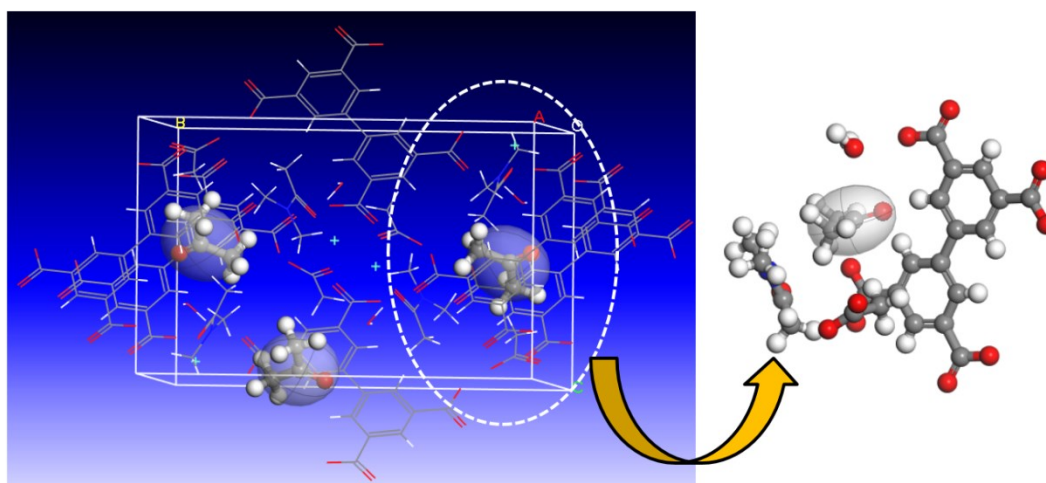

**Fig.S33** The calculated adsorption locate for acetone in 1-Ln using the Sorption method.

**Table S2**

| CP                                         | Metal ratios from starting material preparation | Metal ratios from ICP of digested sample | X           |
|--------------------------------------------|-------------------------------------------------|------------------------------------------|-------------|
| Eu <sub>0.9</sub> Y <sub>0.1</sub> x = 0.9 | Eu : Y = 9 : 1                                  | Eu : Y = 0.91 : 0.09                     | <b>0.91</b> |
| Eu <sub>0.8</sub> Y <sub>0.2</sub> x = 0.8 | Eu : Y = 8 : 2                                  | Eu : Y = 0.82 : 0.18                     | <b>0.82</b> |
| Eu <sub>0.6</sub> Y <sub>0.4</sub> x = 0.6 | Eu : Y = 6 : 4                                  | Eu : Y = 0.64 : 0.36                     | <b>0.64</b> |
| Eu <sub>0.5</sub> Y <sub>0.5</sub> x = 0.5 | Eu : Y = 5 : 5                                  | Eu : Y = 0.53 : 0.57                     | <b>0.53</b> |
| Eu <sub>0.3</sub> Y <sub>0.7</sub> x = 0.3 | Eu : Y = 3 : 7                                  | Eu : Y = 0.29 : 0.71                     | <b>0.29</b> |
| Eu <sub>0.2</sub> Y <sub>0.8</sub> x = 0.2 | Eu : Y = 2 : 8                                  | Eu : Y = 0.24 : 0.76                     | <b>0.24</b> |
| Eu <sub>0.1</sub> Y <sub>0.9</sub> x = 0.1 | Eu : Y = 1 : 9                                  | Eu : Y = 0.08 : 0.92                     | <b>0.08</b> |

  

| CP | Metal ratios from starting material preparation | Metal ratios from ICP of digested sample | X |
|----|-------------------------------------------------|------------------------------------------|---|
|    |                                                 |                                          |   |

|                                                |                       |                             |             |
|------------------------------------------------|-----------------------|-----------------------------|-------------|
| <b>Tb<sub>0.8</sub>Y<sub>0.2</sub> x = 0.8</b> | <b>Tb : Y = 8 : 2</b> | <b>Tb: Y = 0.87 : 0.13</b>  | <b>0.87</b> |
| <b>Tb<sub>0.6</sub>Y<sub>0.4</sub> x = 0.6</b> | <b>Tb : Y = 6 : 4</b> | <b>Tb: Y = 0.67 : 0.33</b>  | <b>0.67</b> |
| <b>Tb<sub>0.4</sub>Y<sub>0.6</sub> x = 0.4</b> | <b>Tb : Y = 4 : 6</b> | <b>Tb: Y = 0.33 : 0.64</b>  | <b>0.33</b> |
| <b>Tb<sub>0.2</sub>Y<sub>0.8</sub> x = 0.2</b> | <b>Tb: Y = 2 : 8</b>  | <b>Tb : Y = 0.21 : 0.79</b> | <b>0.21</b> |
| <b>Tb<sub>0.1</sub>Y<sub>0.9</sub> x = 0.1</b> | <b>Tb : Y = 1 : 9</b> | <b>Tb: Y = 0.19 : 0.81</b>  | <b>0.19</b> |

**Table S3** Quantum yield of **Eu<sub>x</sub>Y<sub>1-x</sub>** and **Tb<sub>x</sub>Y<sub>1-x</sub>**.

| <b>Sample</b>                          | <b>Quantum yield (Φ)</b> | <b>Sample</b>                          | <b>Quantum yield (Φ)</b> |
|----------------------------------------|--------------------------|----------------------------------------|--------------------------|
| <b>Eu<sub>0.9</sub>Y<sub>0.1</sub></b> | <b>45.35%</b>            | <b>Tb<sub>0.9</sub>Y<sub>0.1</sub></b> | <b>24.81%</b>            |
| <b>Eu<sub>0.8</sub>Y<sub>0.2</sub></b> | <b>59.57%</b>            | <b>Tb<sub>0.8</sub>Y<sub>0.2</sub></b> | <b>18.88%</b>            |
| <b>Eu<sub>0.7</sub>Y<sub>0.3</sub></b> | <b>65.66%</b>            | <b>Tb<sub>0.7</sub>Y<sub>0.3</sub></b> | <b>23.47%</b>            |
| <b>Eu<sub>0.6</sub>Y<sub>0.4</sub></b> | <b>70.53%</b>            | <b>Tb<sub>0.6</sub>Y<sub>0.4</sub></b> | <b>26.51%</b>            |
| <b>Eu<sub>0.5</sub>Y<sub>0.5</sub></b> | <b>74.47%</b>            | <b>Tb<sub>0.5</sub>Y<sub>0.5</sub></b> | <b>22.26%</b>            |
| <b>Eu<sub>0.4</sub>Y<sub>0.6</sub></b> | <b>73.19%</b>            | <b>Tb<sub>0.4</sub>Y<sub>0.6</sub></b> | <b>19.39%</b>            |
| <b>Eu<sub>0.3</sub>Y<sub>0.7</sub></b> | <b>71.41%</b>            | <b>Tb<sub>0.3</sub>Y<sub>0.7</sub></b> | <b>17.99%</b>            |
| <b>Eu<sub>0.2</sub>Y<sub>0.8</sub></b> | <b>66.73%</b>            | <b>Tb<sub>0.2</sub>Y<sub>0.8</sub></b> | <b>15.45%</b>            |
| <b>Eu<sub>0.1</sub>Y<sub>0.9</sub></b> | <b>69.04%</b>            | <b>Tb<sub>0.1</sub>Y<sub>0.9</sub></b> | <b>14.02%</b>            |
| <b>1-Eu</b>                            | <b>62.65%</b>            | <b>1-Tb</b>                            | <b>20.32%</b>            |

**Table S4** Selected bond lengths (Å) for **1-Y**.

| <b>Atom</b> | <b>Atom</b>     | <b>Length/Å</b> | <b>Atom</b> | <b>Atom</b> | <b>Length/Å</b> |
|-------------|-----------------|-----------------|-------------|-------------|-----------------|
| Y1          | O2              | 2.397(8)        | Y1          | O3          | 2.397(11)       |
| Y1          | O6              | 2.211(13)       | Y1          | O1          | 2.457(9)        |
| Y1          | O5              | 2.294(9)        | Y1          | O4          | 2.561(9)        |
| Y1          | O4 <sup>1</sup> | 2.303(9)        |             |             |                 |

**Table S5** Selected bond angles (°) for **1-Y**.

| <b>Atom</b>     | <b>Atom</b> | <b>Atom</b>     | <b>Angle/°</b> | <b>Atom</b>     | <b>Atom</b> | <b>Atom</b> | <b>Angle/°</b> |
|-----------------|-------------|-----------------|----------------|-----------------|-------------|-------------|----------------|
| O6              | Y1          | O5              | 89.2(7)        | O6              | Y1          | O1          | 76.5(5)        |
| O6              | Y1          | O4 <sup>1</sup> | 80.1(4)        | O5              | Y1          | O1          | 78.8(3)        |
| O5              | Y1          | O4              | 76.2(3)        | O4 <sup>1</sup> | Y1          | O1          | 145.8(3)       |
| O6              | Y1          | O8 <sup>1</sup> | 116.2(7)       | O8 <sup>1</sup> | Y1          | O1          | 135.8(3)       |
| O5              | Y1          | O8 <sup>1</sup> | 139.1(3)       | O3              | Y1          | O1          | 75.2(4)        |
| O4 <sup>1</sup> | Y1          | O8 <sup>1</sup> | 77.3(3)        | O2              | Y1          | O1          | 53.9(3)        |
| O6              | Y1          | O3              | 151.6(5)       | O6              | Y1          | O4          | 150.5(5)       |
| O5              | Y1          | O3              | 87.1(4)        | O5              | Y1          | O4          | 70.0(3)        |
| O4 <sup>1</sup> | Y1          | O3              | 126.0(4)       | O4 <sup>1</sup> | Y1          | O4          | 74.8(3)        |
| O8 <sup>1</sup> | Y1          | O3              | 83.8(4)        | O9              | Y1          | O4          | 85.7(3)        |
| O6              | Y1          | O2              | 84.0(5)        | O8 <sup>1</sup> | Y1          | O4          | 73.2(3)        |
| O5              | Y1          | O2              | 132.5(3)       | O3              | Y1          | O4          | 51.2(3)        |
| O4 <sup>1</sup> | Y1          | O2              | 147.0(3)       | O2              | Y1          | O4          | 125.5(3)       |

|                 |    |                 |         |    |    |    |          |
|-----------------|----|-----------------|---------|----|----|----|----------|
| O8 <sup>1</sup> | Y1 | O2              | 84.2(3) | O1 | Y1 | O4 | 117.6(3) |
| O3              | Y1 | O2              | 77.9(3) | O1 | Y1 | O4 | 117.6(3) |
| O6              | Y1 | O5              | 89.2(7) | O6 | Y1 | O1 | 76.5(5)  |
| O6              | Y1 | O4 <sup>1</sup> | 80.1(4) | O5 | Y1 | O1 | 78.8(3)  |

---

#### Reference

- 1 H. Hao, Y. Wang, S. Yuan, D. Li and J. Sun, *Acta Crystallogr C Struct Chem*, 2018, **74**, 386-391.
- 2 H. Hao, H. Liu, Y. Wang, S. Yuan, H. Xu, J. Zhang, Y. Wang, D. Li and J. Sun, *Acta Crystallogr C Struct Chem*, 2019, **75**, 221-230.
